# Supplementary material for: Subtly manipulating Zn2+-coordinated configurations with a complexing agent to boost the reversibility of the zinc anode
Source: Royal Society of Chemistry journal article supplement (doi:10.1039/d2cc02769k), 2022-01-01
Supplement: d2cc02769k1.pdf [file d2cc02769k1.pdf]

## Supplementary Information

### Subtly manipulating Zn<sup>2+</sup> coordinated configurations with complexing agent to boost the reversibility of zinc metal anode

*Jingjing Xiang<sup>a,b,d,#</sup>, Minghe Luo<sup>a,#</sup>, Xingxing Wu<sup>b,#</sup>, Yaofeng Zhu<sup>d,\*</sup>, Xuan Zhang<sup>b</sup>,  
Hongge Pan<sup>a,e</sup>, Wenping Sun<sup>a</sup>, Mi Yan<sup>a</sup>, Yingying Lu<sup>b,c,\*</sup>, Yinzhu Jiang<sup>a,b,\*</sup>*

<sup>a</sup>School of Materials Science and Engineering, Zhejiang University, Hangzhou, 310027, P.R. China

<sup>b</sup>ZJU-Hangzhou Global Scientific and Technological Innovation Centre, Zhejiang University, Hangzhou 311200, P.R. China

<sup>c</sup>State Key Laboratory of Chemical Engineering, Institute of Pharmaceutical Engineering, College of Chemical and Biological Engineering, Zhejiang University, Hangzhou 310027, P.R. China

<sup>d</sup>School of Materials Science and Engineering, Zhejiang Sci-Tech University, Hangzhou, 310018, P.R. China

<sup>e</sup>Institute of Science and Technology for New Energy, Xi'an Technological University, Xi'an 710021, P.R. China

## **Experimental section**

**Preparation of  $L_0$ ,  $L_1$ ,  $L_2$ , and  $L_3$  electrolytes:** 50 mL 1 M  $ZnSO_4$  containing 0, 2.12, 3 and 4.6 mL ethylenediamine was denoted as  $L_0$ ,  $L_1$ ,  $L_2$ , and  $L_3$ , respectively. The pH values of all the electrolytes were adjusted to  $\sim 4.5$  with concentrated sulfuric acid.

**Preparation of NiHCF cathode material:** Solution A was prepared by dissolving 3 mmol  $Na_4Fe(CN)_6 \cdot 10H_2O$ , 0.24 mol NaCl and 12 mmol sodium citrate in 100 mL deionized water under magnetic stirring. Solution B was formed by dissolving 6 mmol  $NiSO_4 \cdot 4H_2O$  in 100 mL deionized water under magnetic stirring. Solution A was kept at a constant temperature of 90 °C through an oil bath under  $N_2$  flow, while solution B was added dropwise to solution A at a rate of 1 mL  $min^{-1}$  through a peristaltic pump. Then white precipitate was collected by centrifugation, washed thoroughly with deionized water and ethanol, then dried in a vacuum drying oven at 110 °C for 24 h to obtain NiHCF. As for cathode electrode: NiHCF, Ketjen black and polyvinylidene fluoride (PVDF) were mixed with a mass ratio of 7:2:1. The N-methyl pyrrolidinone (NMP) was added into the mixture, the slurry was then casted onto Ti foil.

**Material characterization:** The phase structures of zinc foil and by-products were assessed by the X-ray diffraction analyzer (XRD, Bruker D8 diffractometer). The surface structure of zinc foil was characterized by scanning electron microscopy (SEM, Hitachi S-4800).

**Electrochemical test:** The electrochemical performance of Zn/NiHCF batteries were tested by using CR2025 coin-type cell, which contains a cathode electrode, a piece of Zn foil as anode electrode and Whatman glass fiber as separator.  $L_0$ ,  $L_1$ ,  $L_2$ , and  $L_3$  were employed as electrolytes. The galvanostatic cycling tests were performed by Neware BTS-5 battery test system. The cyclic voltammetry (CV) and electrochemical impedance spectroscopy (EIS) measurements were carried out on the CHI604E electrochemical station.

**Table S1** The distribution of different Zn<sup>2+</sup>-En coordinated configurations of in various electrolytes.

| Electrolytes   | Zn <sup>2+</sup> | Zn(En) <sup>2+</sup> | Zn(En) <sub>2</sub> <sup>2+</sup> | Zn(En) <sub>3</sub> <sup>2+</sup> |
|----------------|------------------|----------------------|-----------------------------------|-----------------------------------|
| L <sub>0</sub> | 1                | 0                    | 0                                 | 0                                 |
| L <sub>1</sub> | 0.455            | 0.455                | 0.089                             | 2.87×10 <sup>-4</sup>             |
| L <sub>2</sub> | 0.290            | 0.524                | 0.185                             | 1.08×10 <sup>-3</sup>             |
| L <sub>3</sub> | 0.088            | 0.451                | 0.451                             | 7.49×10 <sup>-3</sup>             |

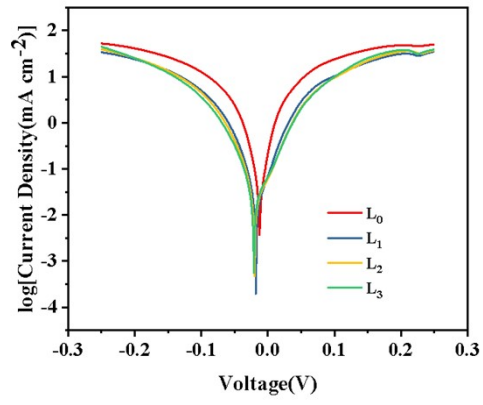

**Fig. S1** Tafel curves for the Zn foil in L<sub>0</sub>~L<sub>3</sub> electrolytes.

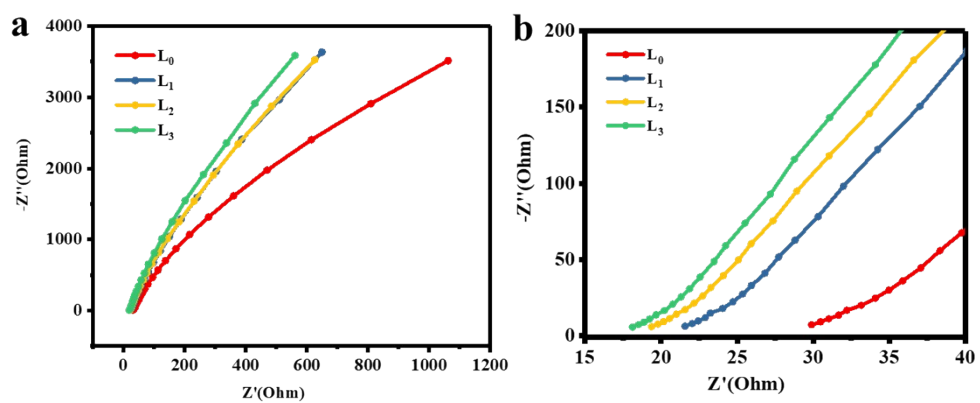

**Fig. S2** The EIS plots (a) and the corresponding enlarged view at high-frequency region (b) in different electrolytes for estimation of ionic conductivities.

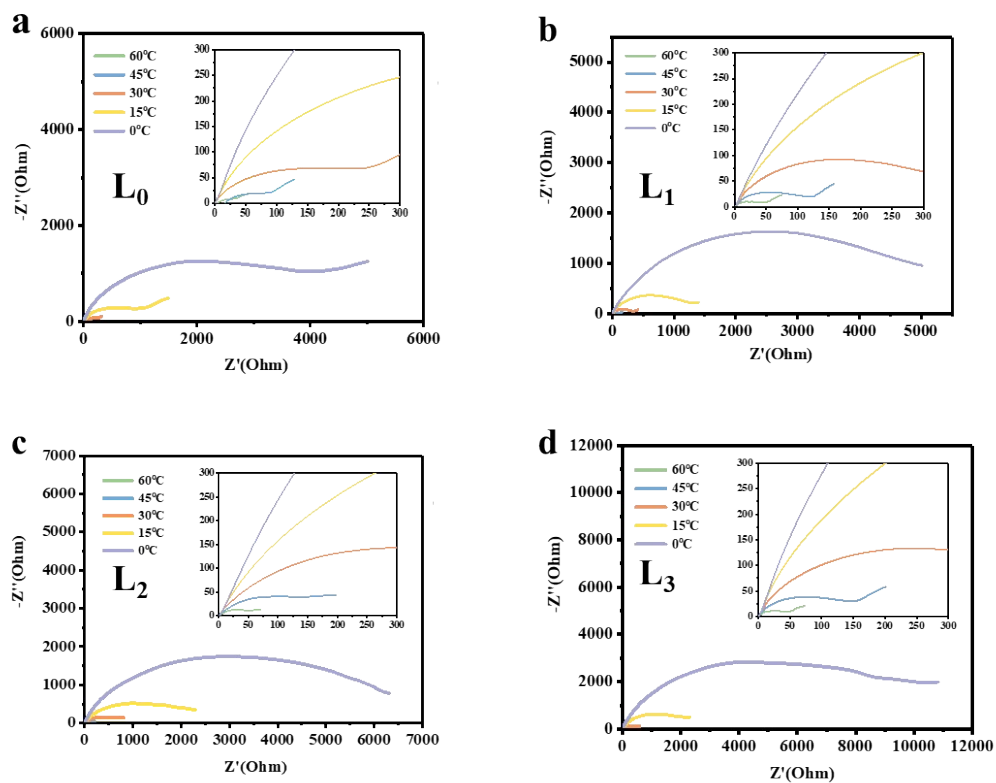

**Fig. S3** The EIS plots of Zn/Zn symmetric batteries with various electrolytes at different temperatures

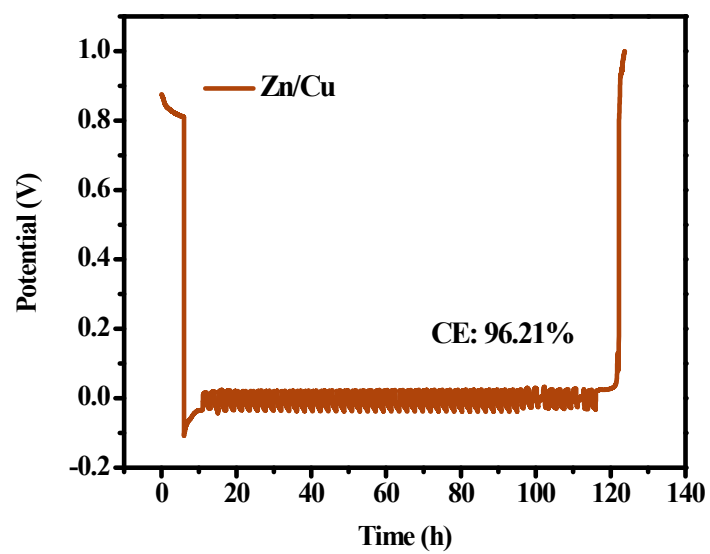

**Fig. S4** Coulombic efficiency tested of Zn/Cu cell in L<sub>3</sub> electrolyte.

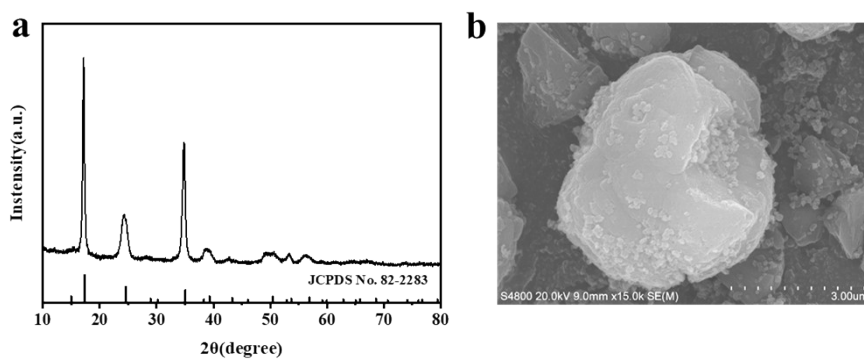

**Fig. S5** (a) XRD patterns and (b) SEM image of synthesized NiHCF.



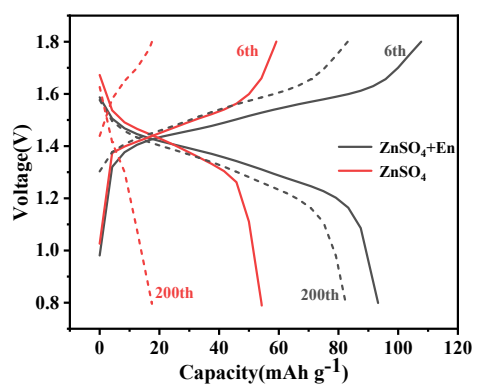

**Fig. S6** Galvanostatic charge-discharge profiles of Zn/ZnSO<sub>4</sub>/NiHCF and Zn/ZnSO<sub>4</sub>+En/NiHCF batteries at 6 th and 200 th, respectively.
